# Supplementary material
Source: Springer Nature journal article supplement (https://www.springermedizin.de/resource/supplementary/12943_2009_519_MOESM5_ESM.pdf/9554960)

# In Early Disease Stage

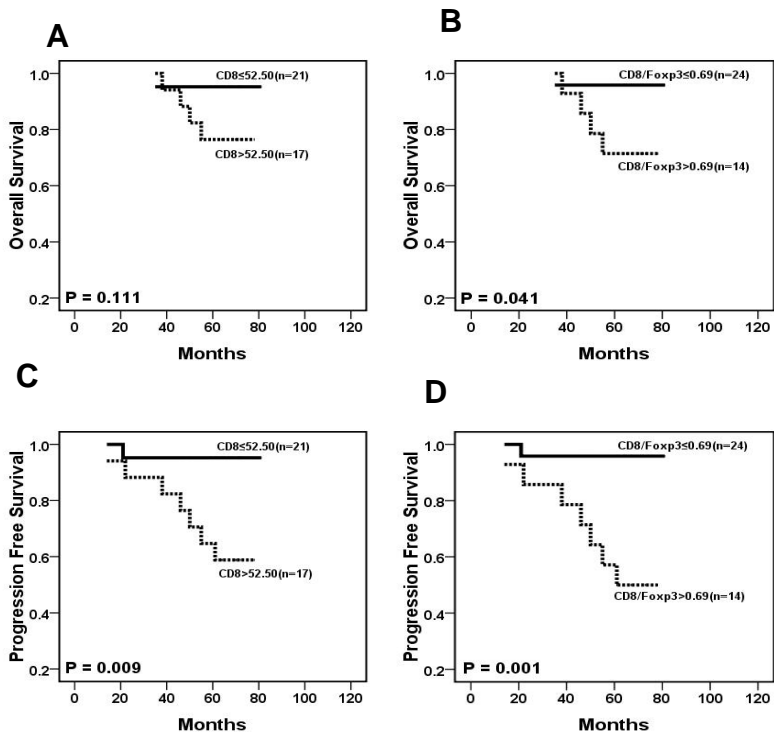

**A**

# In Late Disease Stage

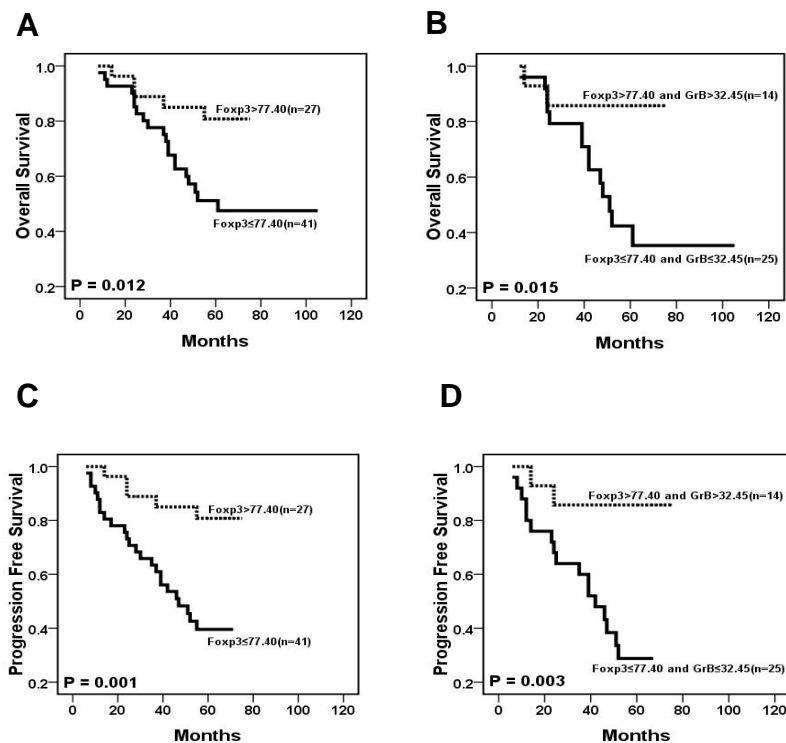

**B**

Supplement: MOESM5 [file 9554960]
